# Supplementary material
Source: Royal Society of Chemistry journal article supplement (doi:10.1039/d6nr00179c)
Supplement: d6nr00179c1.pdf [file d6nr00179c1.pdf]

### Supplementary Information

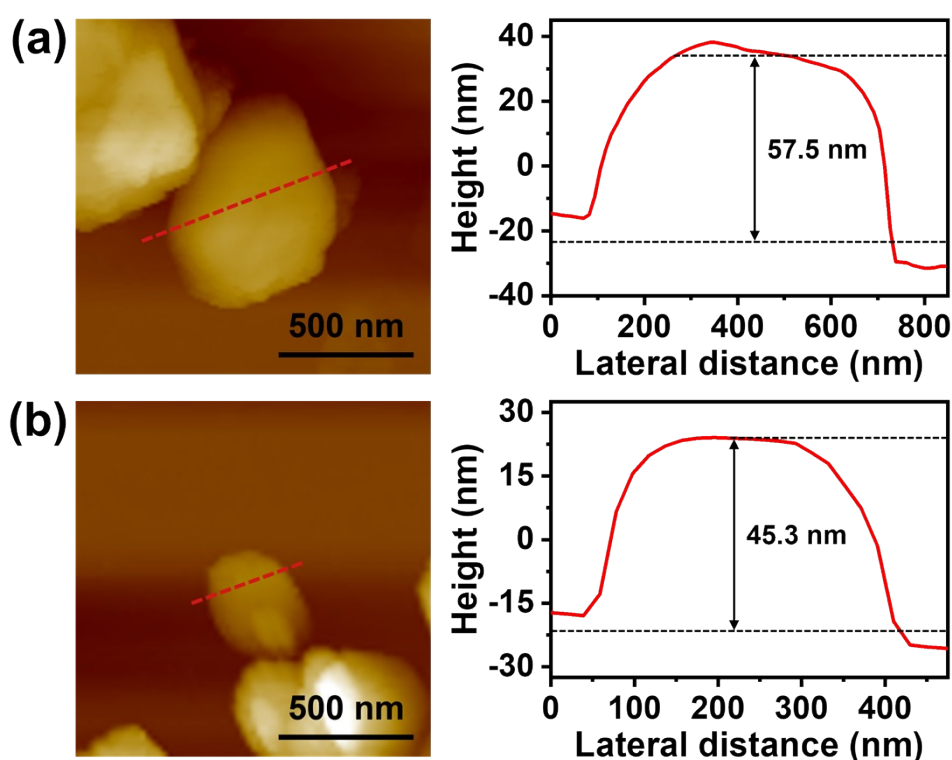

**Fig. S1.** AFM images and height profiles of 2D-assembled PG nanoparticles.

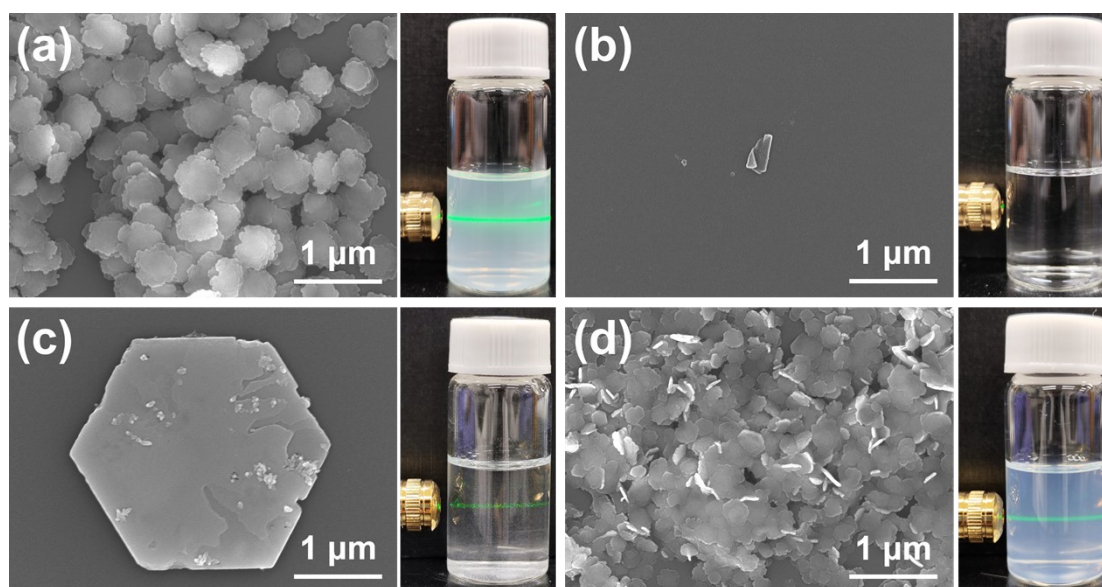

**Fig. S2.** SEM images of PG nanostructures and photographs of laser-exposed PG structure suspensions, synthesized under different solvent compositions at constant precursor content. The precursor : water : organic solvent volume ratio is (a) 1 : 1 : 11 (with water in ethanol), (b) 1 : 0 : 12 (without water in ethanol), (c) 1 : 12 : 0 (without ethanol in water), and (d) 1 : 1 : 11 (with water in acetone).

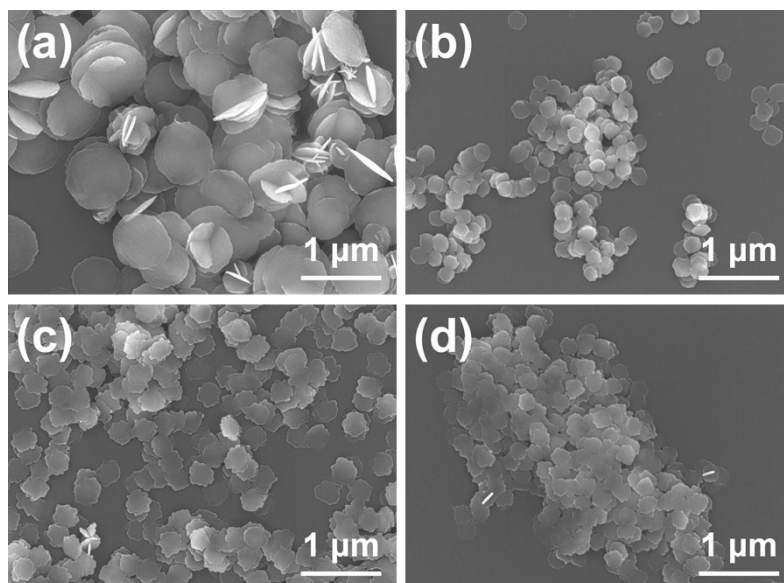

**Fig. S3.** SEM images of PG nanoparticles synthesized with constant precursor : water : alcohol volume ratio of 1 : 1 : 11 using different alcohol solvents: (a) methanol, (b) ethanol, (c) 1-propanol, and (d) 1-butanol.

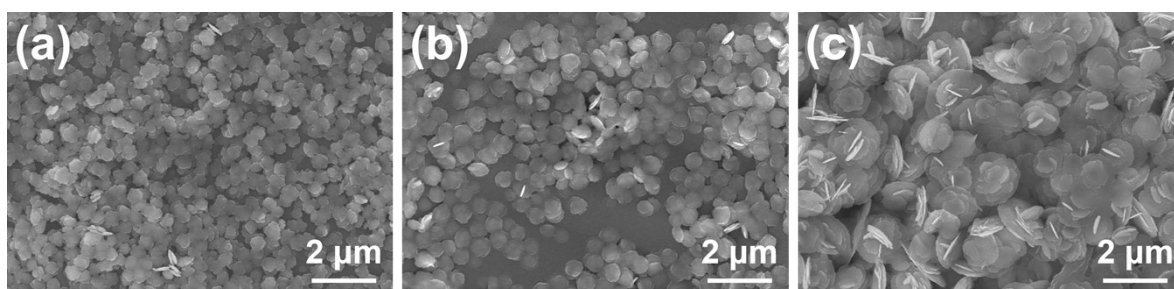

**Fig. S4.** SEM images of PG nanoparticles synthesized at constant precursor : water : alcohol volume ratio of 1 : 1 : 11 with increasing Pb concentration of precursor solution: (a) 0.015, (b) 0.074, and (c) 0.148 M

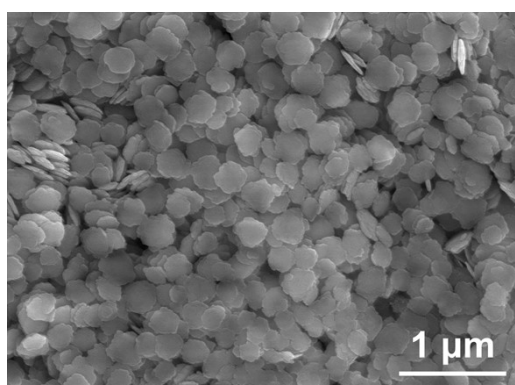

**Fig. S5.** SEM images of 2D-assembled PG nanoparticles using ammonia as a basic catalyst.

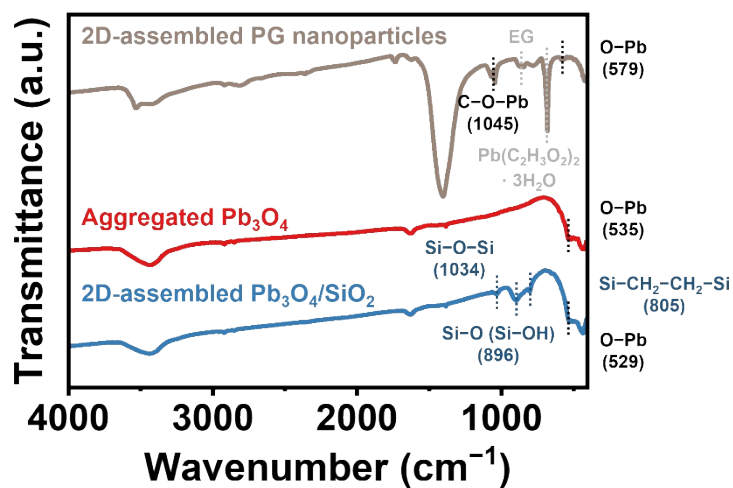

**Fig. S6.** FT-IR spectra of 2D-assembled PG nanoparticles, aggregated  $\text{Pb}_3\text{O}_4$ , and 2D-assembled  $\text{Pb}_3\text{O}_4/\text{SiO}_2$ .

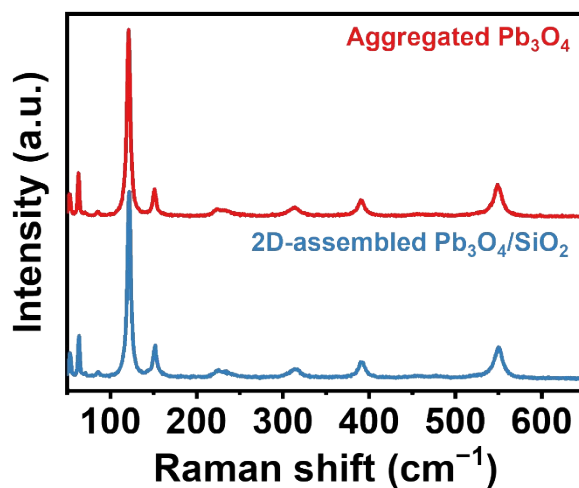

**Fig. S7.** Raman spectra of aggregated  $\text{Pb}_3\text{O}_4$  and 2D-assembled  $\text{Pb}_3\text{O}_4/\text{SiO}_2$ .

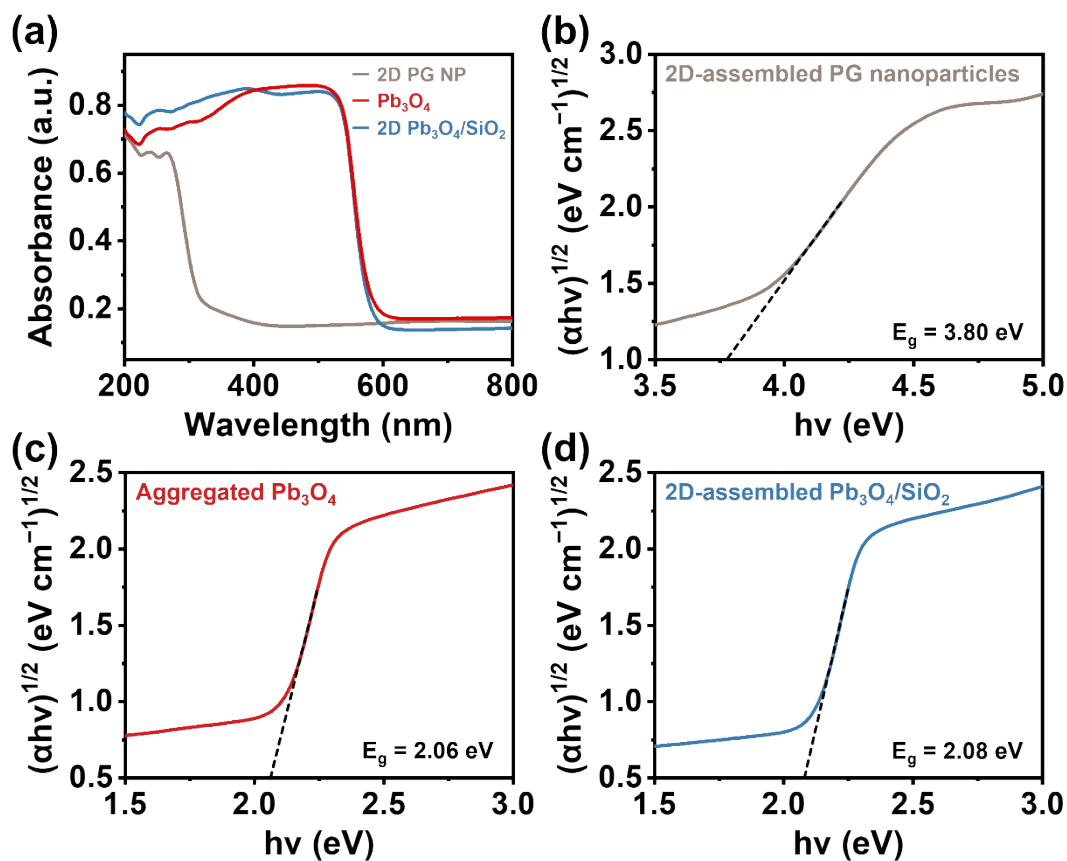

**Fig. S8.** (a) UV-Vis diffuse reflectance spectra and Tauc plots of (b) 2D-assembled PG nanoparticles, (c) aggregated  $\text{Pb}_3\text{O}_4$ , and (d) 2D-assembled  $\text{Pb}_3\text{O}_4/\text{SiO}_2$  ( $E_g$  = bandgap).

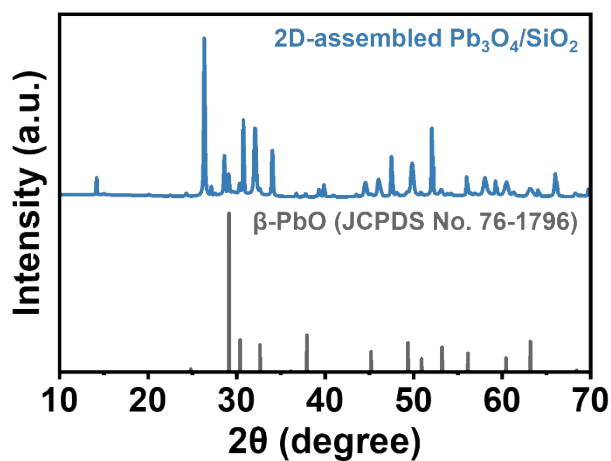

**Fig. S9.** XRD pattern of 2D-assembled  $\text{Pb}_3\text{O}_4/\text{SiO}_2$  with weak  $\beta$ - $\text{PbO}$  reflections.

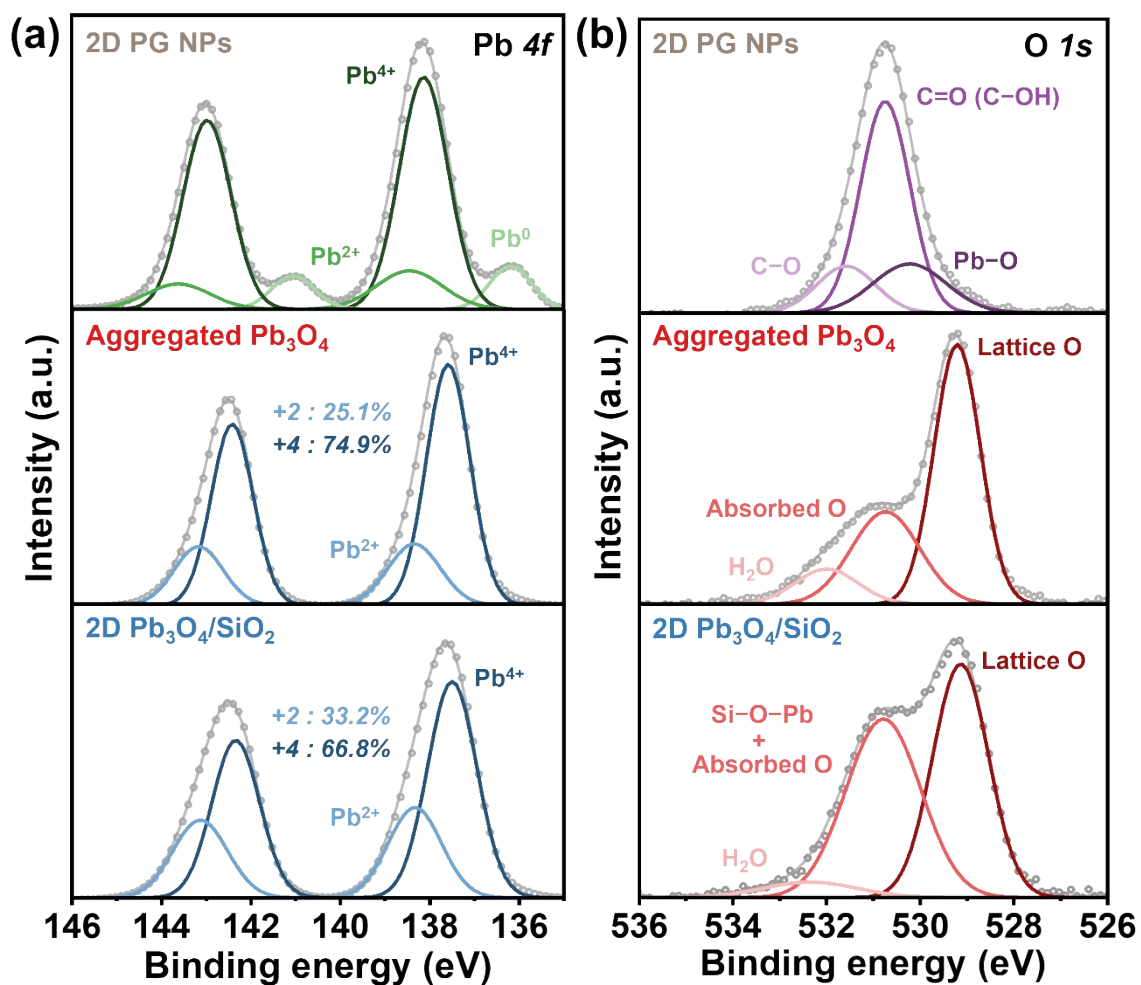

**Fig. S10.** (a) Pb 4f and (b) O 1s XPS spectra of 2D-assembled PG nanoparticles, aggregated  $\text{Pb}_3\text{O}_4$ , and 2D-assembled  $\text{Pb}_3\text{O}_4/\text{SiO}_2$ .

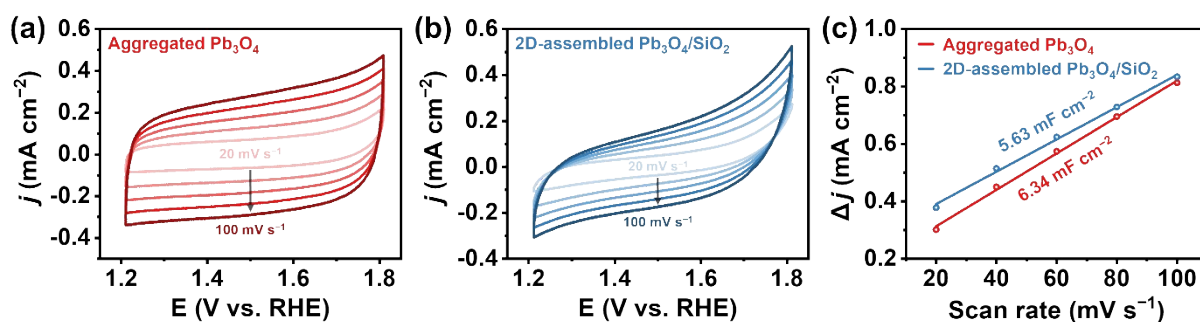

**Fig. S11.** (a,b) CV curves at different scan rates of 20, 40, 60, 80, 100  $\text{mV s}^{-1}$  and (c) corresponding  $C_{dl}$  of aggregated  $\text{Pb}_3\text{O}_4$  and 2D-assembled  $\text{Pb}_3\text{O}_4/\text{SiO}_2$ .

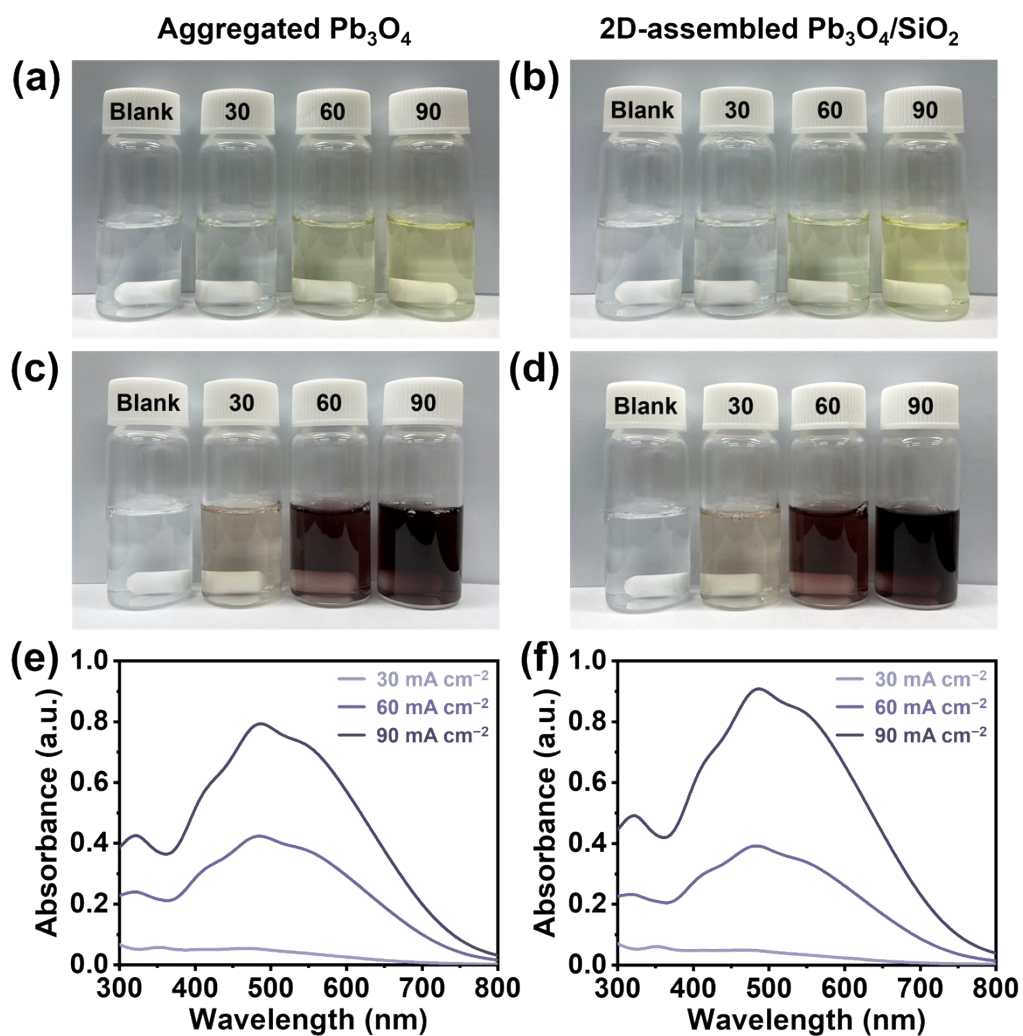

**Fig. S12.** Qualitative comparison of ozone formation at different current densities. Electrolyte color change after (a, b) KI addition and (c, d) KI and starch addition. UV-Vis absorption spectra of electrolytes obtained from (e) aggregated Pb<sub>3</sub>O<sub>4</sub> and (f) 2D-assembled Pb<sub>3</sub>O<sub>4</sub>/SiO<sub>2</sub> anodes.

**Table S1.** Crystallite sizes calculated by the Scherrer equation for selected diffraction planes of aggregated  $\text{Pb}_3\text{O}_4$  and 2D-assembled  $\text{Pb}_3\text{O}_4/\text{SiO}_2$ .

| Diffraction plane | Crystallite size (nm)              |                                         |
|-------------------|------------------------------------|-----------------------------------------|
|                   | Aggregated $\text{Pb}_3\text{O}_4$ | 2D $\text{Pb}_3\text{O}_4/\text{SiO}_2$ |
| (110)             | 72                                 | 71                                      |
| (211)             | 42                                 | 50                                      |
| (202)             | 36                                 | 45                                      |

**Table S2.** Comparison of overpotential values for EOP with previously reported lead oxide-based catalysts.

| Catalysts                                                                  | Overpotential (V)  | Reference               |
|----------------------------------------------------------------------------|--------------------|-------------------------|
| <b><u>2D-assembled <math>\text{Pb}_3\text{O}_4/\text{SiO}_2</math></u></b> | <b><u>2.77</u></b> | <b><u>This work</u></b> |
| $\text{Pb}_2\text{O}_3@\text{Bi}_2\text{O}_3$ -tube                        | 3.26               | 1                       |
| $\beta$ - $\text{PbO}_2/\text{Ta}_2\text{O}_5$ nanorods                    | 2.90               | 2                       |
| $\text{Bi}_{12}\text{PbO}_{20}$                                            | 2.69~2.84          | 3                       |
| $\text{Bi}_6\text{Pb}_2\text{O}_x$                                         | 2.77               | 4                       |
| Commercial $\text{Pb}_3\text{O}_4$                                         | 2.73               | 5                       |
| $\beta$ - $\text{PbO}_2$ -120 nanorods                                     | 2.63               | 6                       |
| Cubic $\text{Pb}_3\text{O}_4@\text{SiO}_2$                                 | 2.61               | 7                       |
| Commercial $\beta$ - $\text{PbO}_2$                                        | 2.51               | 5                       |
| $\text{PbO}_2$ nanorods                                                    | 2.06               | 8                       |

## References

- H. Shi, X. Wang, X. Peng, M. Xue, Y. Xue, F. Gao, X. Zhong, J. Wang, *J. Mater. Chem. A*, 2024, **12**, 10852-10862.
- Y. Yan, Y. Gao, H. Zheng, B. Yuan, Q. Zhang, Y. Gu, G. Zhuang, Z. Wei, Z. Yao, X. Zhong, X. Li, J. Wang, *Appl. Catal. B*, 2020, **266**, 118632.
- H. Shi, G. Feng, S. Li, J. Liu, X. Yang, Y. Li, Y. Lu, X. Zhong, S. Wang, W. Jianguo, *J. Mater. Chem. A*, 2022, **10**, 5430-5441.
- H. Shi, G. Feng, T. Sun, X. Wang, L. Ding, Z. Wang, H. Jin, Q. Chen, S. Wang, X. Zhong, Y. Zhu, J. Wang, *Chem Catal.*, 2023, **3**, 100728.
- J. Liu, S. Wang, Z. Yang, C. Dai, G. Feng, B. Wu, W. Li, L. Shu, K. Elouarzaki, X. Hu, X. Li, H. Wang, Z. Wang, X. Zhong, Z. J. Xu, J. Wang, *EES Catal.*, 2023, **1**, 301-311.
- W. Jiang, S. Wang, J. Liu, H. Zheng, Y. Gu, W. Li, H. Shi, S. Li, X. Zhong, J. Wang, *J. Mater. Chem. A*, 2021, **9**, 9010-9017.
- J. Liu, C. Qiu, Z. Xu, M. Xue, J. Cai, H. Shi, L. Ding, X. Li, X. Zhong, J. Wang, *Chem. Eng. J.*, 2023, **468**, 143504.
- X. Wang, D. Wu, H. Ge, L. Wang, X. Wu, *J. Environ. Chem. Eng.*, 2023, **11**, 110248.
